# Supplementary material for: How the COVID-19 pandemic affected lifestyle and wellbeing factors associated with dementia risk in older adults with Subjective Cognitive Decline and Mild Cognitive Impairment participating in the APPLE-Tree (Active Prevention in People at risk of dementia through Lifestyle, bEhaviour change and Technology to build REsiliEnce) in England
Source: medRxiv preprint, doi:10.1101/2024.10.28.24316260, version 1 (2024-10-29)
Supplement: Coding Tree [file 316260_file02.docx]

**Appendix 1: Coding Tree**

Changes in who you speak to each week

| Key |  |  |  |
| --- | --- | --- | --- |
| N = No change | |  |  |
| = No answer / didn't answer question | | | |
| SP = Same people | |  |  |
| Online = More online calling | | |  |
| Phone = More phone calling | | |  |
| LI = Less in-person | |  |  |
| LP = Less people | |  |  |
| MP = More people | |  |  |
| L/M = Some people more, some people less | | | |
| LO = Less often | |  |  |
| MO = More often | |  |  |
| I = Feel more isolated | |  |  |

Changes in what you eat

| **Key** |  |  |  |
| --- | --- | --- | --- |
| N | no change |  |  |
|  | no answer / didn't answer question | | |
| HE | healthy eating | |  |
| CO | cooked at home more | |  |
| RE | ate out less |  |  |
| MF | more food |  |  |
| MS | more snacks |  |  |
| UN | more unhealthy food | |  |
| CH | chocolate |  |  |
| CA | cake |  |  |
| RM | ready meals/processed food | | |
| BI | biscuits |  |  |
| C | other change | |  |

Changes in what activities you do

| **Key** |  |  |  |
| --- | --- | --- | --- |
| N | no change |  |  |
|  | no answer / didn't answer question | | |
| LA | reduction in one or more activities | | |
| LS | less socialising | |  |
| LE | less exercise |  |  |
| G | no gym |  |  |
| TH | no theatre |  |  |
| L | no library |  |  |
| CC | no community centre | |  |
| S | no shopping |  |  |
| M | no music/concerts | |  |
| F | no football matches | |  |
| TR | no travelling/holidays | |  |
| O | more online activities | |  |
| IA | more indoor activities | |  |
| ME | more exercsie | |  |
| MW | more walking | |  |
| R | found alternative exercise | |  |
| MG | more gardening | |  |

Practical help

| **Key** |  |  |  |
| --- | --- | --- | --- |
| N | no change |  |  |
|  | no answer / didn't answer question | | |
| LS | less access to practical help | | |
| MS | had/needed more support | | |
| D | didn't need practical help | |  |
| SS | had help with shopping/food | | |
| NC | restricted access to cleaners/tradesmen/gardeners | | |
| GP | difficulty accessing medical services | | |
| S | had support from family/friends | | |
| EX | had help from external services | | |

Emotional support

| **Key** |  |  |  |
| --- | --- | --- | --- |
| N | no change |  |  |
|  | no answer / didn't answer question | | |
| LS | less access to EMOTIONAL? help | | |
| MS | had/needed more support | | |
| D | didn't need practical help | |  |
| SS | had help with shopping/food | | |
| NC | restricted access to cleaners/tradesmen/gardeners | | |
| GP | difficulty accessing medical services | | |
| S | had support from family/friends | | |
| EX | had help from external services | | |

Mental wellbeing

| **Key** |  |  |  |
| --- | --- | --- | --- |
| N | no change |  |  |
|  | no answer / didn't answer question | | |
| ? | some change, don't specify type of change | | |
| WM | worse mood |  |  |
| BM | better mood |  |  |
| W | more worried/stressed | |  |
| F | fear of COVID | |  |
| A | more anxious | |  |
| FR | frustrated |  |  |
| AN | angry |  |  |
| B | more bored |  |  |
| D | more depressed | |  |
| L | isolated/lonely | |  |
| I | more irritable/moody | |  |
| WS | worse sleep |  |  |

Physical wellbeing

| **Key** |  |  |  |
| --- | --- | --- | --- |
| N | no change |  |  |
|  | no answer / didn't answer question | | |
| ? | some change, don't specify type of change | | |
| BP | better physical health | |  |
| WP | worse physical health | |  |
| A | increased aches/pains | |  |
| MS | reduced access to medical services | | |
| WG | weight gain |  |  |
| ME | more exercise | |  |
| RE | reduced exercise | |  |

Providing support

| **Key** |  |  |  |
| --- | --- | --- | --- |
| N | no change |  |  |
|  | no answer / didn't answer question | | |
| P | providing more care | |  |
| L | unable to provide as much care | | |
| D | don't care for anyone | |  |
| E | providing more emotional support | | |
| S | bringing provisions to others | | |
| B | cannot provide childcare | |  |
